# Supplementary material for: Report of Meckel’s Diverticulum Mimicking Stricturing Crohn’s Disease in an Adolescent Male
Source: Research Square preprint supplement (doi:10.21203/rs.3.rs-6572158/v1), 2025-06-11
Supplement: Supplementary file 1 [file 99ae4c504a498cb50b4df0ee.docx]

**Table 1. Lab Parameters Throughout Clinical Course**

|  | **Diagnosis of H. pylori**  **[1]** | **Repeat Endoscopy**  **[2]** | **Capsule Endoscopy**  **[3]** | **Leading up to Transfer** | **Upon Transfer**  **[4]** | **After Resection** | **2 Year Follow Up**  **[5]** |
| --- | --- | --- | --- | --- | --- | --- | --- |
| Hgb (g/dL) | **8.7** | **7.4** | **7.3** | **7.9** | **8.5** | 14.8 | 15.5 |
| HCT (%) | **31.1** | **25.7** | **27.0** | **26.9** | **30.4** | 47.3 | 45.5 |
| Platelets (x103)/mcL) | 401 | 399 | 371 | 255 | 237 | 325 | 297 |
| Albumin (gm/dL) | 4.6 | 4.4 | 4.6 | 4.3 | 3.5 | 4.3 | 3.9 |
| CRP (mg/dL) | <0.1 | <0.3 |  | <0.3 | **2.2** | <0.40 | <0.5 |
| ESR (mm/hour) | 4 | 7 |  |  | **25** | 2 | 2 |
| FCP (µg/g) | **254** | **275** | **494** | **551** | **208** |  | 53 |
| Abbreviations: Hgb: Hemoglobin; HCT: hematocrit; CRP: C-reactive protein; ESR: Erythrocyte sedimentation rate; FCP: fecal calprotectin  Of note, labs were grouped to the nearest event outlined in the timeline. Numbers in brackets correspond to the closest significant event.  Those values in bold are outside the normal reference range. Those boxes left blank represent missing values | | | | | | | |

**Table 2: Pediatric Cases of Meckel’s Diverticulum Mimicking Crohn’s Disease**

| **Publication** | **Age (years), Sex** | **Initial Clinical History and Symptoms** | **Labs and Fecal Calprotectin** | **Method of Diagnosis** | **Treatment for IBD** |
| --- | --- | --- | --- | --- | --- |
| Kang et al 11 | 8y,  Male | Three months of pallor and weakness. Capsule endoscopy showing diffuse erythematous mucosa in distal ileum. Ongoing symptoms four years later (melena, syncope). | Hgb 7.7 g/dL  Albumin 4.5 g/dL  CRP 0.04 mg/dL  ESR 6mm/hr  FCP>2000 µg/g | CTA revealed an enhancing structure connected to distal ileum. Small bowel barium study noting concern for possible Meckel’s. Exploratory laparoscopy with resection followed. | Oral Mesalamine |
| Hedge et al 15 | 6y,  Male | Two months of recurrent hematochezia. Imaging suggesting Crohn’s Disease. Diagnosed with Meckels on exploratory laparotomy. CTE was completed noting mesenteric fat stranding, thickened loops of small bowel. Suspected microperforation or micro abscesses. | CRP 9.6 mg/dL  ESR 17 mm/hr | MRE was suggested of perforated Meckel’s Diverticulitis that led to exploratory laparoscopy with resection | None |
| Alvarez et al 16 | 11y,  Male | Six weeks of periumbilical pain, 2 weeks non-bloody diarrhea and fever. Infliximab was started. CT with concerns of a phlegmon with worsening symptoms. | Hgb 9.9 g/dL  Albumin 2.5 g/dL  CRP 221 mg/L  FCP > 1250 ug/g | A technetium 99m scan was obtained that led to exploratory laparoscopy with resection | Infliximab |
| Abbreviations: Hgb: Hemoglobin; HCT: hematocrit; CRP: C-reactive protein; ESR: Erythrocyte sedimentation rate; FCP: fecal calprotectin; CT: computed tomography; CTA: computed tomography angiography; CT: computed tomography enterography; | | | | | |
